# Supplementary material for: Real-World Immunogenicity and Reactogenicity of Two Doses of Pfizer-BioNTech COVID-19 Vaccination in Children Aged 5–11 Years
Source: MDPI journal article supplement (doi:10.3390/vaccines10111954), 2022-11-18
Supplement: s1 [file vaccines-2035280-supplementary.pdf › vaccines-2035280-supplementary.pdf]

## Supplements

**Table S1. Questionnaire for data collection and adverse effects (carried out online a week after vaccination date).**

|     | Question                                                                     | Answer 1       | Answer 2 | Comments       |
|-----|------------------------------------------------------------------------------|----------------|----------|----------------|
| 1.  | What is your child date of birth?                                            |                |          |                |
| 2.  | What is your child gender?                                                   | Male           | Female   |                |
| 3.  | Did the child experience pain at the injection site?                         | Yes            | No       |                |
| 4.  | Did the child experience redness at the injection site?                      | Yes            | No       |                |
| 5.  | Did the child experience swelling at the injection site?                     | Yes            | No       |                |
| 6.  | Did the child experience itching at the injection site?                      | Yes            | No       |                |
| 7.  | Did the child experience other local symptoms?                               | Yes            | No       | Describe       |
| 8.  | How many days did the child experience the local symptoms?                   | Number of days |          |                |
| 9.  | Did your child experience a fever above 37.5°C? How many days did it last?   | Yes            | No       | Number of days |
| 10. | Did your child experience fatigue or weakness? How many days did it last?    | Yes            | No       | Number of days |
| 11. | Did your child experience muscle aches (myalgia)? How many days did it last? | Yes            | No       | Number of days |
| 12. | Did your child experience enlargement of glands? How many days did it last?  |                |          | Number of days |
| 13. | Did your child experience a headache? How many days did it last?             | Yes            | No       | Number of days |
| 14. | Did your child experience facial nerve palsy? How many days did it last?     | Yes            | No       |                |
| 15. | Did your child experience paresthesia? How many days did it last?            | Yes            | No       |                |
| 16. | Did your child experience allergy? How many days did it last?                | Yes            | No       |                |
| 17. | Did your child experience changes in laboratory tests, if performed?         | Yes            | No       |                |
| 18. | Did your child miss school? For how many days?                               | Yes            | No       | Number of days |
| 19. | Did your child need medical treatment?                                       | Describe       |          | Describe       |
| 20. | Did your child need hospitalization due to the vaccine side effects?         | Yes            | No       | Describe       |

**Table S2. Questionnaire of description of symptoms including long COVID-19.**  
(Carried out online at day 180 of the study)

|               | Question                                                                                                     | Answer 1       | Answer 2 | Comments |
|---------------|--------------------------------------------------------------------------------------------------------------|----------------|----------|----------|
| 1.            | Was your child infected with COVID-19?                                                                       | Yes            | No       |          |
| 2.            | How many days has your child been sick with COVID-19?                                                        | Number of days |          |          |
| 3.            | How many school days did your child lose?                                                                    | Number of days |          |          |
| 4.            | Were there any symptoms?                                                                                     | Yes            | No       |          |
| 5.            | Did your child experience a fever above 37.5 for up to 2 days?                                               | Yes            | No       |          |
| 6.            | Did your child experience a fever above 37.5 for over than 2 days?                                           | Yes            | No       |          |
| 7.            | Did your child experience fatigue or weakness?                                                               | Yes            | No       |          |
| 8.            | Did your child experience a headache?                                                                        | Yes            | No       |          |
| 10.           | Did your child experience reduced/change sense of test and smell?                                            | Yes            | No       |          |
| 11.           | Did your child experience shortness of breath?                                                               | Yes            | No       |          |
| 12.           | Did your child experience cough?                                                                             | Yes            | No       |          |
| 13.           | Did your child experience rhinorrhea?                                                                        | Yes            | No       |          |
| 14.           | Did your child experience a sore throat?                                                                     | Yes            | No       |          |
| 15.           | Did your child experience gastrointestinal inconvenience/diarrhea?                                           | Yes            | No       |          |
| 16.           | Did your child need hospitalization?                                                                         | Yes            | No       |          |
| 17.           | Did your child experience any other symptoms?                                                                | Describe       |          |          |
| Long COVID-19 |                                                                                                              |                |          |          |
| 1.            | Did your child experience any long COVID-19 symptoms (more than 2 weeks after the initial illness?           | Yes            | No       |          |
| 2.            | Did your child experience long COVID-19 symptoms such fatigue?                                               | Yes            | No       |          |
| 3.            | Did your child experience long COVID-19 symptoms such as trouble with concentration/ Confusion/ Memory loss? | Yes            | No       |          |
| 4.            | Did your child experience long COVID-19 symptoms such feelings of sadness/ depression?                       | Yes            | No       |          |
| 5.            | Did your child experience long COVID-19 symptoms such as Agitation\ Anxiety?                                 | Yes            | No       |          |
| 6.            | Did your child experience long COVID-19 symptoms such as reduced/change sense of test and smell?             | Yes            | No       |          |
| 7.            | Did your child experience long COVID-19 symptoms such as shortness of breath?                                | Yes            | No       |          |
| 8.            | Did your child experience long COVID-19 symptoms such as cough?                                              | Yes            | No       |          |
| 9.            | Did your child experience long COVID-19 symptoms such as headache?                                           | Yes            | No       |          |
| 10.           | Did your child experience long COVID-19 symptoms such as gastrointestinal inconvenience/diarrhea?            | Yes            | No       |          |
| 11.           | Did your child experience long COVID-19 symptoms such as decreased physical fitness?                         | Yes            | No       |          |
| 12.           | Did your child experience long COVID-19 symptoms such as chest pain?                                         | Yes            | No       |          |

|     |                                                                                       |          |    |
|-----|---------------------------------------------------------------------------------------|----------|----|
| 13. | Did your child experience long COVID-19 symptoms such palpitations?                   | Yes      | No |
| 14. | Did your child experience long COVID-19 symptoms such as shortness of breath at rest? | Yes      | No |
| 15. | Did your child experience any other symptoms?                                         | Describe |    |

**Table S3. GeoMean (CI 95%) of IgG titer of all children and of infected and uninfected children (BAU/IU).**

| <b>IgG</b>     | <b>All Children<br/>GeoMean (CI95%)</b> | <b>Infected Children<br/>GeoMean (CI95%)</b> | <b>Uninfected Children<br/>GeoMean (CI95%)</b> |
|----------------|-----------------------------------------|----------------------------------------------|------------------------------------------------|
| <b>Day 0</b>   | 0.44<br>(0.36 -0.55)                    | -                                            | -                                              |
| <b>Day 21</b>  | 178.5<br>(129.2 – 245.3)                | -                                            | -                                              |
| <b>Day 90</b>  | 1523.0<br>(1163.0 -1996.0)              | 1670.0<br>(1131.0 - 2466.0) (P>0.05)         | 1291.0<br>(929.6 - 1792.0)                     |
| <b>Day 180</b> | 1076<br>(712.3 -1624.0)                 | 1479.0<br>(878.2 - 2490.0)<br>(*p<0.05)      | 535.3<br>(288.4 - 933.6)                       |

**Table S4. GeoMean (CI 95%) of neutralizing antibody titer of all children and of infected and uninfected children.**

| <b>IgG</b>     | <b>All Children<br/>GeoMean (CI95%)</b> | <b>Infected Children<br/>GeoMean (CI95%)</b> | <b>Uninfected Children<br/>GeoMean (CI95%)</b> |
|----------------|-----------------------------------------|----------------------------------------------|------------------------------------------------|
| <b>Day 0</b>   | 0.1<br>(0.1-0.12)                       | -                                            | -                                              |
| <b>Day 21</b>  | 78.2<br>(54.4 – 114.3)                  | -                                            | -                                              |
| <b>Day 90</b>  | 892.7<br>(630.5–1264.0)                 | 1057.0 (645.9 - 1730.0)<br>(P>0.05)          | 664.0 (425.6 - 1036.0)                         |
| <b>Day 180</b> | 1203.0<br>(698.5–2072.0)                | 2250.0 (1185.0 – 4272.0)<br>(*p<0.05)        | 658.8 (291.9 - 1487.0)                         |

**Table S5. Description of long COVID-19 symptoms.**

|     | <b>Long COVID-19 symptoms</b>                                            | <b>N (%)</b> |
|-----|--------------------------------------------------------------------------|--------------|
| 1.  | Any long COVID-19 symptoms (more than 2 weeks after the initial illness) | 3            |
| 2.  | Fatigue/weakness                                                         | 1            |
| 3.  | Trouble with concentration/Confusion/Memory loss                         | 0            |
| 4.  | Sadness/depression                                                       | 0            |
| 5.  | Agitation\ Anxiety                                                       | 0            |
| 6.  | Reduced/change sense of taste and smell                                  | 1            |
| 7.  | Shortness of breath                                                      | 0            |
| 8.  | Cough                                                                    | 0            |
| 9.  | Headache                                                                 | 1            |
| 10. | Gastrointestinal inconvenience/diarrhea                                  | 0            |
| 11. | Decreased physical fitness                                               | 0            |
| 12. | Chest pain                                                               | 0            |
| 13. | Palpitations                                                             | 0            |
| 14. | Shortness of breath at rest                                              | 0            |
| 15. | Any other symptoms                                                       | 0            |
